# Supplementary material
Source: publisher figshare collection journal article supplement (https://frontiersin.figshare.com/ndownloader/files/16776803)

## A) Q $\beta$ (RNA) vs Q $\beta$ (o) – 4503 genes

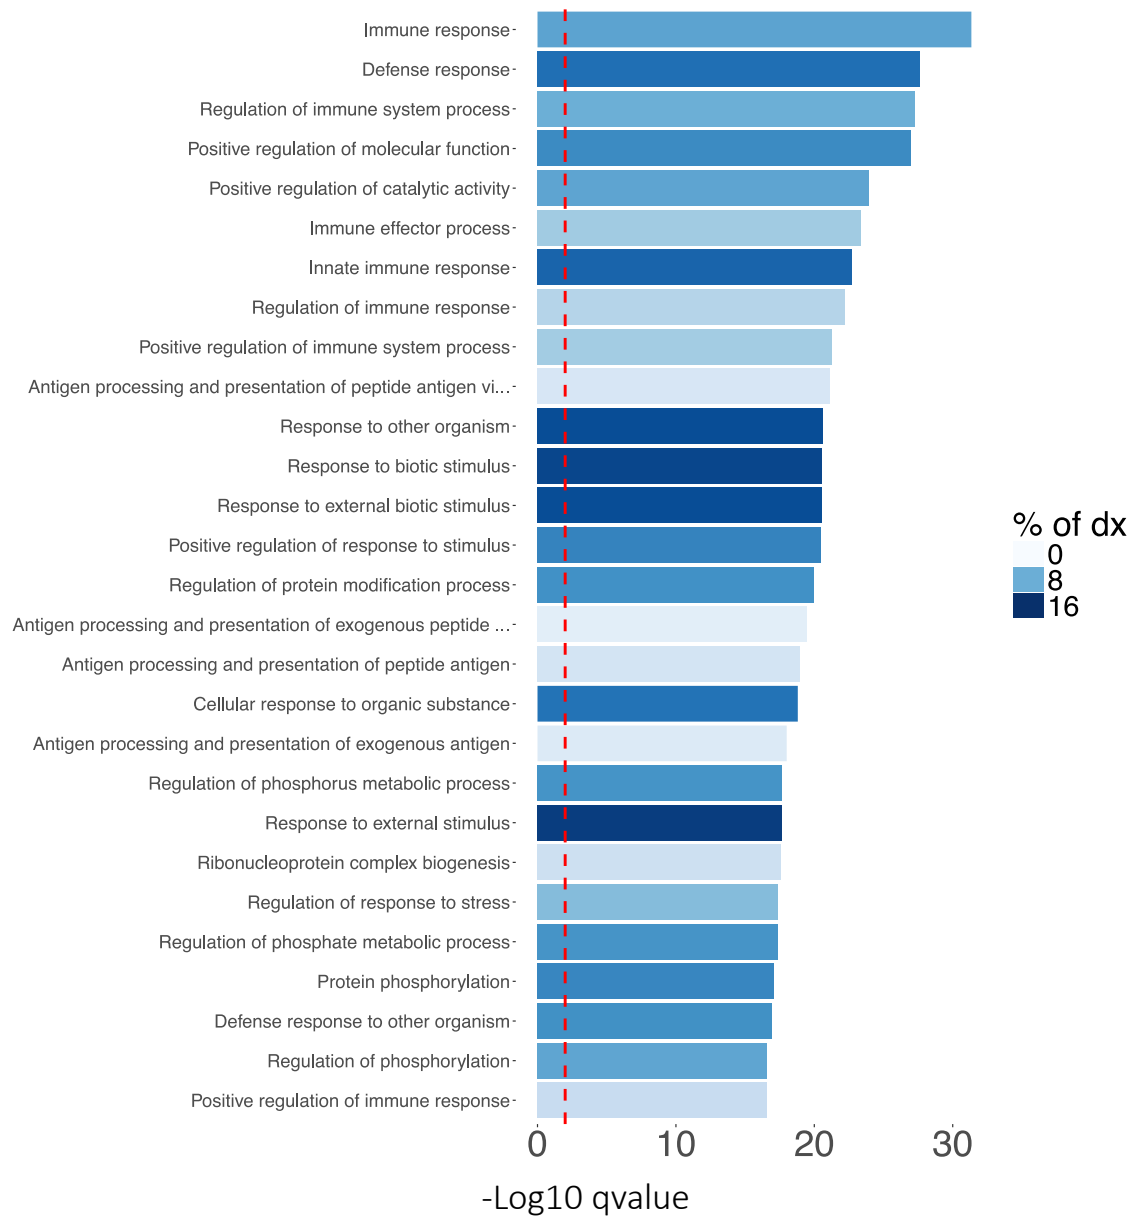

## B) Q $\beta$ (o) vs Q $\beta$ (1668) - 3853

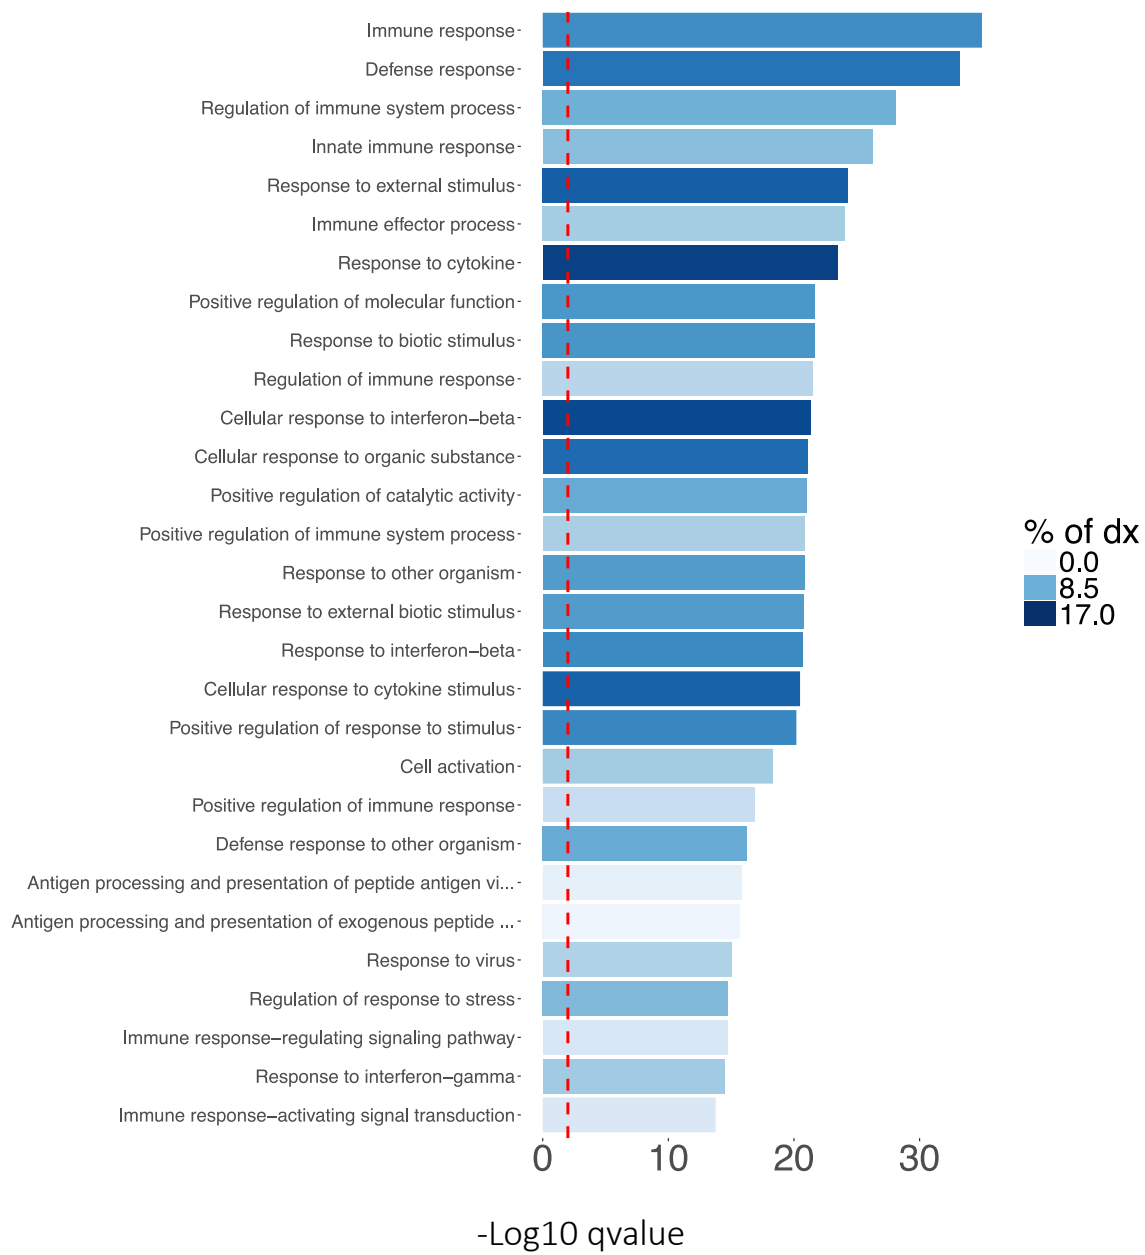

### C) Q $\beta$ (RNA) vs Q $\beta$ (1668) – 279 genes

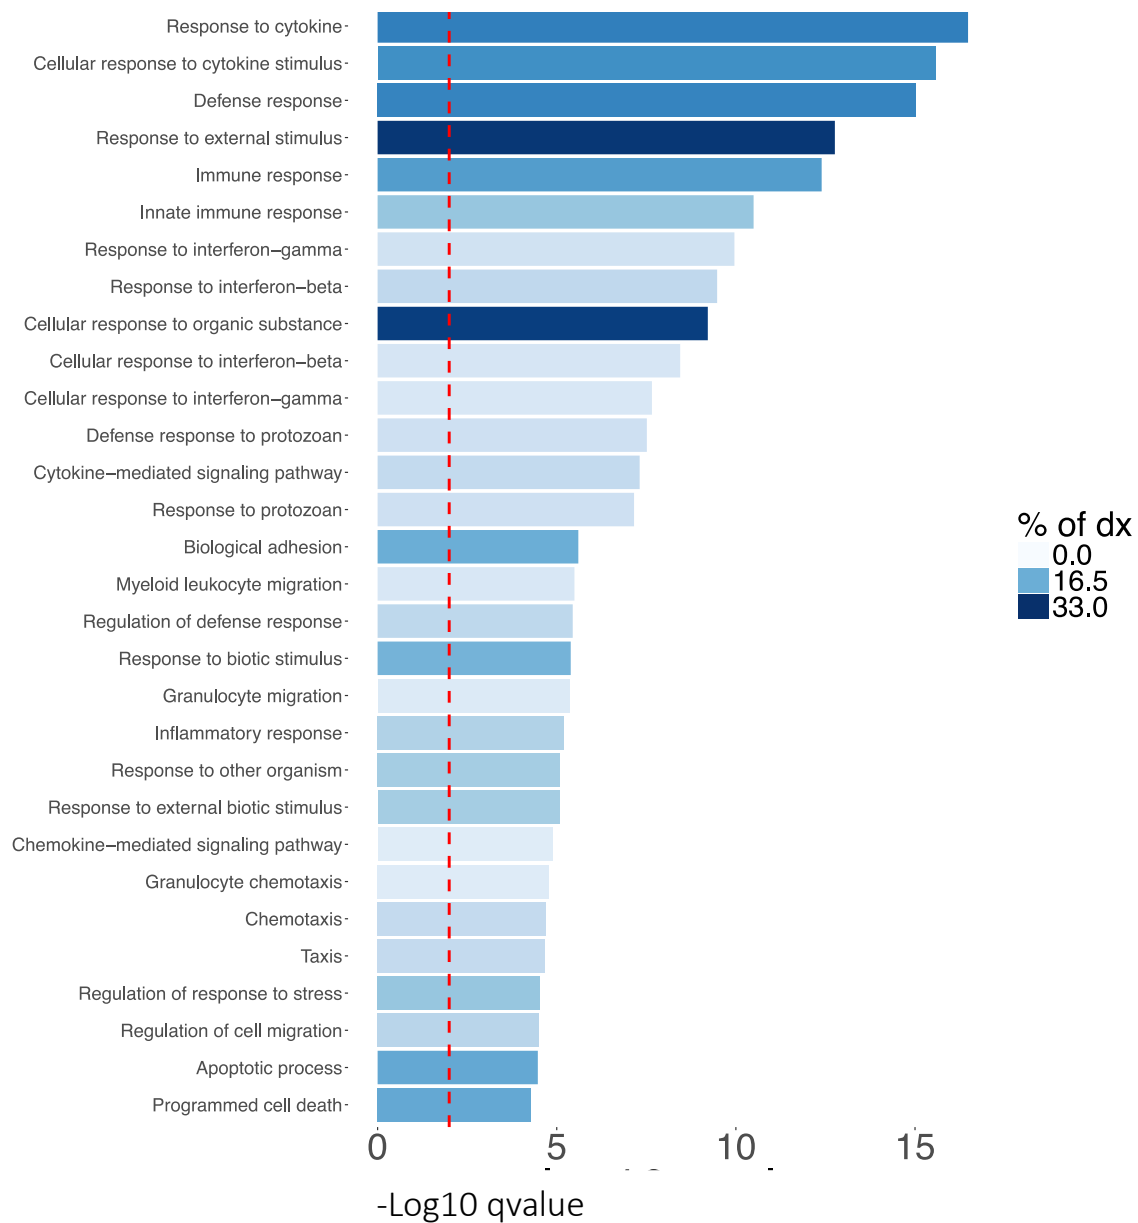

Supplement: Supplementary file [file 16776803]
